# Supplementary material for: Estimation of Vaccine Effectiveness of CoronaVac and BNT162b2 Against Severe Outcomes Over Time Among Patients With SARS-CoV-2 Omicron
Source: PubMed Central journal article supplement (PMC9898822; doi:10.1001/jamanetworkopen.2022.54777), 2023-02-03
Supplement: jamanetwopen-e2254777-s002.pdf [file jamanetwopen-e2254777-s002.pdf]

## Data Sharing Statement

Wei. Estimation of Vaccine Effectiveness of CoronaVac and BNT162b2 Against Severe Outcomes Over Time Among Patients With SARS-CoV-2 Omicron. *JAMA Netw Open*. Published February 03, 2023. doi:10.1001/jamanetworkopen.2022.54777

### Data

**Data available:** No

### Additional Information

**Explanation for why data not available:** The sharing of data is restricted by the Department of Health, Hong Kong.
